# Supplementary material
Source: publisher site journal article supplement (https://www.dovepress.com/article/539951)
Supplement: Supplementary file 1 [file Supplementary%20files_clean.docx]

**Supplementary materials**

**Table S1. Instrument variables of CKD**

| SNP | Effect_allele | Other_allele | Beta | SE | P | F-statistic |
| --- | --- | --- | --- | --- | --- | --- |
| rs10224002 | A | G | -0.1083 | 0.0102 | 2.65E-26 | 112.7339 |
| rs1049518 | A | G | 0.0788 | 0.0094 | 5.42E-17 | 70.2740 |
| rs11761603 | T | C | -0.0674 | 0.0119 | 1.35E-08 | 32.0792 |
| rs12205178 | A | G | 0.0931 | 0.0140 | 3.09E-11 | 44.2223 |
| rs13391258 | T | C | -0.0600 | 0.0108 | 2.74E-08 | 30.8641 |
| rs1458038 | T | C | -0.0590 | 0.0100 | 4.21E-09 | 34.8098 |
| rs17730281 | A | G | -0.0869 | 0.0110 | 2.68E-15 | 62.4097 |
| rs1889937 | A | G | -0.0624 | 0.0100 | 5.15E-10 | 38.9374 |
| rs2484639 | A | G | -0.0774 | 0.0092 | 2.95E-17 | 70.7790 |
| rs2580350 | A | G | 0.0550 | 0.0098 | 1.69E-08 | 31.4971 |
| rs35716097 | T | C | 0.0785 | 0.0105 | 8.20E-14 | 55.8931 |
| rs3925584 | T | C | 0.0800 | 0.0092 | 4.68E-18 | 75.6140 |
| rs4871907 | A | C | -0.0628 | 0.0097 | 9.91E-11 | 41.9154 |
| rs62300825 | A | G | -0.0949 | 0.0116 | 2.63E-16 | 66.9290 |
| rs700221 | A | G | -0.0719 | 0.0098 | 2.19E-13 | 53.8274 |
| rs7178881 | A | C | -0.0544 | 0.0092 | 4.14E-09 | 34.9639 |
| rs77924615 | A | G | -0.2237 | 0.0128 | 6.38E-69 | 305.4287 |
| rs881858 | A | G | 0.0616 | 0.0101 | 1.19E-09 | 37.1978 |
| rs9474801 | A | G | 0.0522 | 0.0096 | 4.61E-08 | 29.5663 |

**Abbreviations:** CKD, chronic kidney disease; SNP, single-nucleotide polymorphism; SE, standard error.

**Table S2. Instrument variables of eGFR**

| SNP | Effect_allele | Other_allele | Beta | SE | P | F-statistic |
| --- | --- | --- | --- | --- | --- | --- |
| rs10086569 | T | C | 0.0028 | 0.0004 | 5.73E-12 | 47.4042 |
| rs10122824 | T | G | -0.0024 | 0.0004 | 2.84E-10 | 39.7996 |
| rs10224002 | A | G | 0.0068 | 0.0004 | 2.74E-66 | 295.7871 |
| rs10430743 | T | G | 0.0025 | 0.0003 | 2.86E-13 | 53.3177 |
| rs1047891 | A | C | -0.0065 | 0.0004 | 3.59E-64 | 286.0583 |
| rs10498755 | T | C | -0.0049 | 0.0006 | 6.04E-15 | 60.8978 |
| rs10838702 | T | G | -0.0023 | 0.0004 | 6.31E-11 | 42.7173 |
| rs10846157 | A | C | -0.0036 | 0.0004 | 1.34E-16 | 68.4113 |
| rs10851885 | A | G | 0.0050 | 0.0004 | 3.28E-34 | 148.7234 |
| rs10887903 | A | G | 0.0019 | 0.0003 | 3.52E-08 | 30.3898 |
| rs10964603 | T | C | -0.0025 | 0.0004 | 7.75E-09 | 33.3241 |
| rs10994860 | T | C | 0.0039 | 0.0004 | 2.70E-18 | 76.1117 |
| rs11062167 | A | G | -0.0042 | 0.0003 | 7.08E-34 | 147.2370 |
| rs11071738 | T | C | -0.0025 | 0.0003 | 5.49E-13 | 52.0302 |
| rs11227260 | T | G | -0.0032 | 0.0004 | 4.47E-19 | 79.6484 |
| rs112545201 | T | C | -0.0042 | 0.0005 | 8.79E-17 | 69.2250 |
| rs11260709 | T | C | 0.0024 | 0.0004 | 1.87E-10 | 40.5852 |
| rs11261022 | A | C | -0.0027 | 0.0004 | 3.67E-14 | 57.3330 |
| rs112880707 | T | C | 0.0056 | 0.0006 | 6.69E-23 | 97.0897 |
| rs113956264 | T | C | 0.0081 | 0.0012 | 1.65E-11 | 45.3465 |
| rs115926813 | A | G | -0.0054 | 0.0009 | 1.24E-09 | 36.9139 |
| rs11644400 | T | C | -0.0030 | 0.0005 | 1.11E-09 | 37.1239 |
| rs11657044 | T | C | -0.0076 | 0.0005 | 5.34E-60 | 266.9442 |
| rs11694902 | A | G | 0.0041 | 0.0005 | 2.14E-16 | 67.4813 |
| rs117113238 | A | G | 0.0039 | 0.0006 | 1.06E-10 | 41.7112 |
| rs11753995 | A | G | 0.0034 | 0.0005 | 4.58E-13 | 52.3750 |
| rs11784052 | T | C | 0.0027 | 0.0004 | 9.78E-15 | 59.9743 |
| rs11794652 | A | G | -0.0028 | 0.0005 | 9.34E-09 | 32.9834 |
| rs11951093 | A | G | -0.0056 | 0.0004 | 2.05E-54 | 241.2726 |
| rs12163971 | A | C | -0.0032 | 0.0005 | 4.33E-12 | 47.9517 |
| rs1268176 | A | G | 0.0027 | 0.0004 | 7.05E-14 | 56.0749 |
| rs12920176 | A | C | -0.0026 | 0.0004 | 2.35E-13 | 53.6873 |
| rs12940987 | A | G | -0.0043 | 0.0004 | 3.84E-25 | 107.2915 |
| rs12989250 | A | G | -0.0026 | 0.0004 | 1.23E-11 | 45.9393 |
| rs13047277 | T | C | 0.0022 | 0.0004 | 4.86E-08 | 29.7 720 |
| rs13146355 | A | G | -0.0074 | 0.0003 | 8.31E-102 | 458.9699 |
| rs13157326 | A | G | -0.0027 | 0.0004 | 2.95E-12 | 48.7150 |
| rs132641 | A | G | -0.0027 | 0.0005 | 1.30E-08 | 32.3155 |
| rs1377164 | T | C | 0.0034 | 0.0004 | 9.84E-16 | 64.4675 |
| rs1397764 | A | G | 0.0047 | 0.0004 | 7.83E-34 | 147.0151 |
| rs140179699 | A | G | 0.0073 | 0.0011 | 1.16E-11 | 46.0264 |
| rs1458038 | T | C | 0.0032 | 0.0004 | 3.60E-17 | 70.9676 |
| rs1548945 | T | C | 0.0037 | 0.0004 | 1.27E-24 | 104.9608 |
| rs1569011 | A | G | 0.0020 | 0.0003 | 1.73E-08 | 31.7643 |
| rs1585499 | T | C | -0.0030 | 0.0004 | 7.00E-17 | 69.6876 |
| rs1595810 | A | G | -0.0024 | 0.0004 | 4.40E-08 | 29.9561 |
| rs168505 | T | C | -0.0027 | 0.0004 | 2.18E-14 | 58.3464 |
| rs16930370 | T | C | 0.0041 | 0.0005 | 1.87E-19 | 81.3499 |
| rs1719934 | A | G | 0.0028 | 0.0003 | 3.73E-16 | 66.3816 |
| rs17696736 | A | G | 0.0020 | 0.0004 | 9.72E-09 | 32.8887 |
| rs1819008 | T | C | -0.0019 | 0.0003 | 2.49E-08 | 31.0541 |
| rs1883991 | A | C | -0.0032 | 0.0004 | 2.33E-17 | 71.8610 |
| rs1910738 | T | G | 0.0023 | 0.0004 | 1.15E-08 | 32.5630 |
| rs1913641 | T | G | -0.0020 | 0.0003 | 4.77E-09 | 34.2727 |
| rs1994887 | A | C | -0.0024 | 0.0004 | 2.34E-09 | 35.6547 |
| rs2039424 | A | G | 0.0048 | 0.0004 | 9.75E-41 | 178.5653 |
| rs2068888 | A | G | -0.0026 | 0.0003 | 6.31E-14 | 56.2498 |
| rs2071047 | A | G | 0.0020 | 0.0003 | 1.10E-08 | 32.6576 |
| rs2074204 | T | C | -0.0025 | 0.0004 | 2.18E-10 | 40.2922 |
| rs2145166 | A | G | -0.0033 | 0.0006 | 1.38E-08 | 32.2169 |
| rs2156664 | T | C | -0.0021 | 0.0004 | 3.76E-08 | 30.2682 |
| rs223308 | A | G | -0.0027 | 0.0003 | 3.00E-15 | 62.2369 |
| rs2244237 | T | G | 0.0027 | 0.0004 | 8.43E-11 | 42.1491 |
| rs2252281 | T | C | 0.0041 | 0.0004 | 8.47E-30 | 128.5451 |
| rs233438 | A | G | 0.0043 | 0.0004 | 2.84E-22 | 94.1961 |
| rs2365286 | A | G | -0.0033 | 0.0004 | 2.08E-17 | 72.0537 |
| rs2412608 | T | C | 0.0031 | 0.0004 | 4.31E-18 | 75.2019 |
| rs2490391 | A | C | -0.0025 | 0.0003 | 5.46E-13 | 52.0514 |
| rs2509851 | A | C | 0.0021 | 0.0004 | 1.62E-09 | 36.3742 |
| rs2608915 | A | G | 0.0025 | 0.0004 | 2.38E-09 | 35.6379 |
| rs2634675 | A | G | 0.0028 | 0.0004 | 5.30E-13 | 52.0963 |
| rs267738 | T | G | -0.0050 | 0.0004 | 1.33E-32 | 141.3784 |
| rs27879 | A | C | -0.0020 | 0.0004 | 1.86E-08 | 31.6285 |
| rs2792796 | T | C | -0.0021 | 0.0004 | 3.14E-09 | 35.0915 |
| rs281380 | T | C | -0.0022 | 0.0004 | 1.90E-09 | 36.0779 |
| rs2823139 | A | G | -0.0027 | 0.0004 | 1.01E-13 | 55.3488 |
| rs2834321 | A | G | -0.0027 | 0.0004 | 2.34E-09 | 35.6644 |
| rs2954017 | T | C | 0.0026 | 0.0004 | 3.18E-11 | 44.0533 |
| rs3018667 | A | G | -0.0024 | 0.0004 | 1.23E-10 | 41.4260 |
| rs3111316 | A | G | -0.0019 | 0.0004 | 4.89E-08 | 29.7604 |
| rs3134605 | T | C | 0.0033 | 0.0004 | 2.77E-13 | 53.3609 |
| rs325442 | A | G | 0.0021 | 0.0003 | 3.02E-09 | 35.1541 |
| rs34117451 | T | C | -0.0026 | 0.0005 | 1.52E-08 | 32.0360 |
| rs35004449 | T | G | 0.0027 | 0.0004 | 2.56E-12 | 48.9889 |
| rs35072105 | A | G | -0.0021 | 0.0004 | 1.97E-09 | 36.0067 |
| rs35472707 | T | C | -0.0075 | 0.0008 | 9.53E-20 | 82.7081 |
| rs363092 | A | C | -0.0022 | 0.0004 | 5.55E-10 | 38.4730 |
| rs3731906 | T | C | -0.0030 | 0.0004 | 2.30E-15 | 62.7707 |
| rs3744139 | T | G | 0.0023 | 0.0004 | 3.39E-10 | 39.4290 |
| rs3757387 | T | C | 0.0029 | 0.0004 | 2.48E-16 | 67.1890 |
| rs3791221 | A | G | 0.0021 | 0.0004 | 3.00E-09 | 35.1920 |
| rs3793805 | A | G | -0.0020 | 0.0004 | 1.03E-08 | 32.8021 |
| rs3795503 | T | C | 0.0022 | 0.0004 | 1.51E-08 | 32.0555 |
| rs3797537 | A | G | 0.0021 | 0.0004 | 1.86E-08 | 31.6554 |
| rs3812036 | T | C | -0.0069 | 0.0004 | 3.19E-64 | 286.3830 |
| rs3814828 | A | G | 0.0022 | 0.0004 | 2.13E-09 | 35.8441 |
| rs3822939 | A | G | -0.0028 | 0.0003 | 3.08E-16 | 66.7386 |
| rs3845534 | A | G | -0.0019 | 0.0003 | 3.91E-08 | 30.1975 |
| rs3850625 | A | G | 0.0048 | 0.0006 | 3.57E-18 | 75.5567 |
| rs3905668 | A | G | -0.0026 | 0.0004 | 2.81E-11 | 44.3283 |
| rs3925584 | T | C | -0.0055 | 0.0003 | 3.01E-56 | 249.6811 |
| rs396341 | T | C | 0.0030 | 0.0004 | 1.72E-14 | 58.8330 |
| rs3993747 | A | G | -0.0022 | 0.0004 | 2.73E-09 | 35.3515 |
| rs407102 | T | C | 0.0031 | 0.0004 | 3.80E-16 | 66.3347 |
| rs4072824 | A | C | 0.0023 | 0.0004 | 8.38E-09 | 33.1938 |
| rs41284816 | T | G | -0.0079 | 0.0012 | 1.56E-10 | 40.9540 |
| rs4410790 | T | C | -0.0023 | 0.0004 | 1.92E-10 | 40.5473 |
| rs4566 | T | G | 0.0020 | 0.0004 | 1.03E-08 | 32.7957 |
| rs4567937 | A | G | -0.0032 | 0.0004 | 6.40E-18 | 74.3869 |
| rs4656220 | T | C | 0.0021 | 0.0004 | 1.60E-09 | 36.4201 |
| rs4788809 | A | G | -0.0021 | 0.0004 | 2.46E-09 | 35.5683 |
| rs4794814 | A | G | -0.0059 | 0.0004 | 5.03E-49 | 216.5874 |
| rs4808154 | T | C | 0.0026 | 0.0004 | 7.77E-09 | 33.3244 |
| rs4836732 | T | C | 0.0025 | 0.0003 | 4.69E-13 | 52.3241 |
| rs499600 | T | G | -0.0037 | 0.0005 | 8.93E-15 | 60.1142 |
| rs544169 | A | G | 0.0024 | 0.0004 | 9.98E-10 | 37.3490 |
| rs55759218 | A | G | -0.0039 | 0.0004 | 6.09E-24 | 101.8171 |
| rs55938024 | A | G | -0.0065 | 0.0006 | 1.37E-26 | 113.8690 |
| rs6029632 | A | G | 0.0020 | 0.0003 | 1.43E-08 | 32.1402 |
| rs6088528 | A | G | -0.0033 | 0.0003 | 9.61E-22 | 91.7911 |
| rs6135224 | A | G | -0.0020 | 0.0004 | 4.04E-08 | 30.1381 |
| rs61927768 | A | G | -0.0023 | 0.0004 | 5.36E-09 | 34.0351 |
| rs623834 | T | C | -0.0022 | 0.0004 | 2.90E-09 | 35.2425 |
| rs62394289 | A | G | 0.0037 | 0.0005 | 3.23E-12 | 48.5282 |
| rs62432759 | A | G | -0.0025 | 0.0004 | 7.56E-09 | 33.3755 |
| rs62491533 | T | C | -0.0027 | 0.0005 | 2.11E-09 | 35.8793 |
| rs6458868 | T | C | -0.0021 | 0.0004 | 3.50E-09 | 34.9023 |
| rs6546869 | A | G | 0.0061 | 0.0004 | 1.66E-48 | 214.2038 |
| rs66473811 | T | C | 0.0031 | 0.0005 | 2.02E-10 | 40.4526 |
| rs6667182 | T | C | -0.0043 | 0.0004 | 2.22E-23 | 99.2568 |
| rs67216675 | T | G | 0.0022 | 0.0004 | 1.75E-09 | 36.2212 |
| rs67571561 | T | C | 0.0064 | 0.0009 | 7.64E-13 | 51.3663 |
| rs6948759 | T | C | -0.0026 | 0.0004 | 1.01E-09 | 37.2909 |
| rs6971211 | T | C | -0.0029 | 0.0004 | 3.10E-15 | 62.2078 |
| rs7084764 | A | G | 0.0026 | 0.0003 | 2.92E-14 | 57.7845 |
| rs7185391 | T | G | -0.0026 | 0.0004 | 1.15E-11 | 46.0308 |
| rs7188071 | T | C | 0.0024 | 0.0004 | 8.62E-12 | 46.6137 |
| rs7203398 | A | C | 0.0027 | 0.0004 | 2.86E-12 | 48.7886 |
| rs72714330 | T | C | 0.0037 | 0.0005 | 9.20E-12 | 46.4795 |
| rs72995641 | A | G | -0.0026 | 0.0004 | 1.39E-09 | 36.6931 |
| rs73116829 | A | G | -0.0043 | 0.0006 | 1.64E-13 | 54.3876 |
| rs7326821 | A | G | 0.0026 | 0.0005 | 3.82E-08 | 30.2228 |
| rs736820 | A | G | -0.0021 | 0.0004 | 5.27E-09 | 34.1123 |
| rs7514450 | T | C | 0.0022 | 0.0003 | 1.48E-10 | 41.0751 |
| rs7565830 | A | G | -0.0022 | 0.0004 | 8.77E-09 | 33.1063 |
| rs7592697 | T | C | -0.0020 | 0.0004 | 3.18E-08 | 30.5930 |
| rs7667050 | T | C | 0.0020 | 0.0003 | 2.98E-09 | 35.2050 |
| rs7719960 | A | G | 0.0026 | 0.0004 | 5.24E-10 | 38.5768 |
| rs77924615 | A | G | 0.0096 | 0.0005 | 1.21E-99 | 449.0368 |
| rs780094 | T | C | 0.0046 | 0.0004 | 4.16E-38 | 166.5650 |
| rs78444298 | A | G | -0.0107 | 0.0014 | 2.53E-14 | 58.0668 |
| rs78660602 | A | G | -0.0057 | 0.0006 | 7.39E-22 | 92.3350 |
| rs78986840 | T | C | -0.0045 | 0.0007 | 1.37E-09 | 36.7144 |
| rs79346194 | A | G | -0.0021 | 0.0004 | 1.22E-08 | 32.4539 |
| rs79760705 | T | G | 0.0056 | 0.0006 | 2.55E-24 | 103.5502 |
| rs8028182 | T | G | -0.0026 | 0.0004 | 6.74E-09 | 33.5984 |
| rs8050794 | T | C | 0.0022 | 0.0004 | 2.03E-08 | 31.4546 |
| rs807624 | T | G | 0.0034 | 0.0004 | 1.53E-20 | 86.3520 |
| rs8101667 | T | C | 0.0050 | 0.0004 | 2.19E-43 | 190.7821 |
| rs881858 | A | G | -0.0056 | 0.0004 | 1.15E-49 | 219.5506 |
| rs929934 | T | C | 0.0020 | 0.0004 | 2.16E-08 | 31.3359 |
| rs9419939 | A | G | 0.0026 | 0.0004 | 5.31E-09 | 34.0824 |
| rs9807656 | T | C | -0.0034 | 0.0006 | 3.76E-09 | 34.7433 |
| rs9838792 | A | G | 0.0031 | 0.0004 | 4.76E-19 | 79.5290 |
| rs9868185 | A | G | 0.0027 | 0.0003 | 1.50E-14 | 59.0994 |
| rs9894634 | T | C | -0.0021 | 0.0003 | 1.69E-09 | 36.3025 |

**Abbreviations:** eGFR, estimated glomerular filtration rate; SNP, single-nucleotide polymorphism; SE, standard error.

**Table S3. Instrument variables of UACR**

| SNP | Effect_allele | Other_allele | Beta | SE | P | F-statistic |
| --- | --- | --- | --- | --- | --- | --- |
| rs10023335 | T | C | 0.0144 | 0.0020 | 9.72E-13 | 50.8989 |
| rs1047891 | A | C | -0.0190 | 0.0022 | 2.55E-18 | 76.2091 |
| rs1057868 | T | C | 0.0122 | 0.0022 | 3.09E-08 | 30.6512 |
| rs1086899 | T | C | -0.0124 | 0.0022 | 2.98E-08 | 30.7219 |
| rs11078597 | T | C | -0.0160 | 0.0026 | 7.13E-10 | 37.9841 |
| rs11709284 | A | G | 0.0112 | 0.0020 | 1.86E-08 | 31.6414 |
| rs12790943 | T | C | 0.0137 | 0.0020 | 1.17E-11 | 46.0247 |
| rs1309546 | T | C | 0.0124 | 0.0020 | 5.90E-10 | 38.3536 |
| rs13132085 | A | G | -0.0128 | 0.0022 | 6.28E-09 | 33.7465 |
| rs1337526 | A | G | -0.0271 | 0.0025 | 1.34E-27 | 118.5173 |
| rs144135542 | T | C | 0.0146 | 0.0026 | 3.15E-08 | 30.6110 |
| rs15052 | T | C | 0.0173 | 0.0027 | 2.17E-10 | 40.3077 |
| rs162890 | T | C | 0.0135 | 0.0022 | 6.27E-10 | 38.2356 |
| rs16864515 | A | C | -0.0189 | 0.0034 | 1.98E-08 | 31.5134 |
| rs1688031 | T | C | -0.0195 | 0.0029 | 1.64E-11 | 45.3631 |
| rs17035646 | A | G | 0.0120 | 0.0021 | 1.36E-08 | 32.2468 |
| rs17158386 | A | G | 0.0198 | 0.0023 | 2.17E-17 | 71.9847 |
| rs2068888 | A | G | -0.0124 | 0.0020 | 5.50E-10 | 38.4932 |
| rs2277537 | A | G | 0.0150 | 0.0020 | 1.76E-13 | 54.2609 |
| rs2433611 | A | C | -0.0175 | 0.0023 | 9.11E-15 | 60.0779 |
| rs2470893 | T | C | 0.0230 | 0.0022 | 1.08E-26 | 114.3757 |
| rs2601006 | T | C | -0.0155 | 0.0021 | 1.56E-13 | 54.4937 |
| rs2880119 | A | C | -0.0164 | 0.0029 | 9.22E-09 | 32.9990 |
| rs2954021 | A | G | 0.0148 | 0.0020 | 6.89E-14 | 56.0982 |
| rs34257409 | T | G | 0.0161 | 0.0020 | 1.63E-15 | 63.4614 |
| rs35572189 | A | G | -0.0120 | 0.0022 | 3.05E-08 | 30.6781 |
| rs35692677 | A | G | -0.0164 | 0.0026 | 2.93E-10 | 39.7191 |
| rs3850625 | A | G | 0.0177 | 0.0031 | 1.36E-08 | 32.2375 |
| rs4410790 | T | C | -0.0219 | 0.0021 | 2.03E-26 | 113.1232 |
| rs45437393 | T | C | 0.0488 | 0.0080 | 1.28E-09 | 36.8492 |
| rs4641276 | T | C | -0.0128 | 0.0023 | 3.61E-08 | 30.3500 |
| rs4665972 | T | C | 0.0174 | 0.0021 | 6.20E-17 | 69.9137 |
| rs4738817 | A | G | -0.0115 | 0.0020 | 7.39E-09 | 33.4322 |
| rs4899263 | A | G | -0.0136 | 0.0020 | 1.57E-11 | 45.4413 |
| rs56336142 | T | C | -0.0173 | 0.0024 | 1.29E-12 | 50.3516 |
| rs6535594 | A | G | 0.0144 | 0.0020 | 5.74E-13 | 51.9361 |
| rs67339103 | A | G | 0.0172 | 0.0025 | 2.45E-12 | 49.0865 |
| rs6998967 | A | G | -0.0152 | 0.0027 | 1.40E-08 | 32.1853 |
| rs7115200 | T | G | -0.0123 | 0.0020 | 2.02E-09 | 35.9523 |
| rs73065147 | T | C | -0.0264 | 0.0039 | 1.69E-11 | 45.2968 |
| rs7597336 | A | G | -0.0200 | 0.0030 | 2.43E-11 | 44.5851 |
| rs7812843 | A | G | -0.0117 | 0.0020 | 3.62E-09 | 34.8192 |
| rs78444298 | A | G | -0.0473 | 0.0075 | 2.84E-10 | 39.7820 |
| rs838142 | A | G | 0.0172 | 0.0023 | 8.78E-14 | 55.6217 |
| rs988712 | T | G | -0.0132 | 0.0023 | 1.79E-08 | 31.7127 |

**Abbreviations:** UACR, urinary albumin-to-creatinine ratio; SNP, single-nucleotide polymorphism; SE, standard error.

**Table S4. Instrument variables of senile cataract**

| SNP | Effect_allele | Other_allele | Beta | SE | P | F-statistic |
| --- | --- | --- | --- | --- | --- | --- |
| rs1014607 | A | G | -0.0616 | 0.0104 | 2.70E-09 | 35.3854 |
| rs10258092 | C | T | 0.0720 | 0.0106 | 1.29E-11 | 45.8332 |
| rs11189944 | A | G | 0.0756 | 0.0117 | 9.06E-11 | 42.0146 |
| rs1129038 | T | C | -0.0840 | 0.0120 | 2.79E-12 | 48.8282 |
| rs11657487 | T | C | 0.0465 | 0.0079 | 3.64E-09 | 34.8090 |
| rs1200105 | C | T | -0.0455 | 0.0080 | 1.57E-08 | 31.9655 |
| rs12314392 | G | A | 0.0631 | 0.0078 | 4.62E-16 | 65.9511 |
| rs12430162 | T | C | 0.0562 | 0.0077 | 3.25E-13 | 53.0493 |
| rs12972970 | A | G | -0.0602 | 0.0103 | 5.17E-09 | 34.1259 |
| rs147570901 | A | G | -0.1358 | 0.0239 | 1.34E-08 | 32.2708 |
| rs1532548 | C | T | 0.0580 | 0.0106 | 4.37E-08 | 29.9798 |
| rs1679013 | T | C | 0.0561 | 0.0078 | 7.63E-13 | 51.3743 |
| rs1993689 | C | T | -0.0816 | 0.0095 | 7.52E-18 | 74.0747 |
| rs205488 | C | T | -0.0608 | 0.0092 | 4.35E-11 | 43.4519 |
| rs2596522 | G | A | 0.0501 | 0.0084 | 2.64E-09 | 35.4334 |
| rs28617339 | C | T | -0.0749 | 0.0077 | 1.40E-22 | 95.6092 |
| rs36039219 | A | G | 0.0581 | 0.0089 | 5.55E-11 | 42.9719 |
| rs3795451 | T | C | 0.0450 | 0.0078 | 8.58E-09 | 33.1394 |
| rs4559153 | T | C | 0.0701 | 0.0092 | 3.42E-14 | 57.4781 |
| rs4709713 | A | G | -0.0528 | 0.0077 | 6.26E-12 | 47.2448 |
| rs4774403 | A | G | 0.0462 | 0.0077 | 2.41E-09 | 35.6120 |
| rs4814857 | G | A | 0.1476 | 0.0109 | 1.64E-41 | 182.1556 |
| rs4872531 | G | A | 0.0552 | 0.0082 | 1.83E-11 | 45.1483 |
| rs56055503 | G | A | 0.0522 | 0.0085 | 1.01E-09 | 37.3024 |
| rs57096576 | T | C | 0.1066 | 0.0159 | 1.81E-11 | 45.1687 |
| rs6040069 | G | A | -0.0554 | 0.0100 | 3.32E-08 | 30.5126 |
| rs62621812 | A | G | 0.1570 | 0.0190 | 1.20E-16 | 68.6141 |
| rs6501911 | A | G | -0.0500 | 0.0077 | 7.22E-11 | 42.4571 |
| rs7080472 | T | G | 0.0455 | 0.0082 | 2.54E-08 | 31.0304 |
| rs7135149 | A | G | -0.0521 | 0.0080 | 7.89E-11 | 42.2848 |
| rs7405798 | G | A | -0.0489 | 0.0077 | 2.55E-10 | 39.9921 |
| rs79052447 | G | A | 0.1169 | 0.0197 | 2.78E-09 | 35.3288 |
| rs9842371 | T | C | 0.1328 | 0.0084 | 1.46E-56 | 251.1509 |
| rs9902550 | A | G | 0.0467 | 0.0082 | 1.30E-08 | 32.3320 |

**Abbreviations:** SNP, single-nucleotide polymorphism; SE, standard error.

**Table S5. Instrument variables of POAG**

| SNP | Effect_allele | Other_allele | Beta | SE | P | F-statistic |
| --- | --- | --- | --- | --- | --- | --- |
| rs10800155 | G | A | -0.2736 | 0.0201 | 2.47E-42 | 185.9207 |
| rs11709526 | A | C | -0.1418 | 0.0166 | 1.31E-17 | 72.9768 |
| rs117149770 | C | T | 0.2406 | 0.0409 | 4.06E-09 | 34.5966 |
| rs117399807 | A | C | 0.2292 | 0.0414 | 3.08E-08 | 30.6535 |
| rs12787853 | C | T | 0.1086 | 0.0180 | 1.66E-09 | 36.3391 |
| rs1286767 | C | T | -0.1298 | 0.0235 | 3.17E-08 | 30.6017 |
| rs12916478 | T | C | -0.1077 | 0.0168 | 1.34E-10 | 41.2519 |
| rs132384 | G | A | -0.1102 | 0.0172 | 1.37E-10 | 41.2099 |
| rs138689397 | C | T | 0.2137 | 0.0312 | 7.60E-12 | 46.8671 |
| rs17125973 | G | A | -0.1084 | 0.0190 | 1.20E-08 | 32.4890 |
| rs185970880 | A | G | 0.2112 | 0.0380 | 2.73E-08 | 30.8877 |
| rs2472496 | A | G | -0.1653 | 0.0170 | 1.85E-22 | 95.0535 |
| rs2627761 | T | C | -0.1291 | 0.0234 | 3.59E-08 | 30.3576 |
| rs2745572 | G | A | -0.1616 | 0.0171 | 3.31E-21 | 89.3481 |
| rs33912345 | A | C | -0.1431 | 0.0180 | 1.85E-15 | 63.2172 |
| rs3786113 | C | T | 0.0958 | 0.0168 | 1.09E-08 | 32.6788 |
| rs4653304 | T | C | 0.0934 | 0.0167 | 2.21E-08 | 31.2964 |
| rs60513664 | T | C | 0.3550 | 0.0526 | 1.51E-11 | 45.5265 |
| rs676015 | C | T | -0.1131 | 0.0174 | 9.20E-11 | 41.9837 |
| rs6845653 | T | C | -0.1698 | 0.0170 | 1.66E-23 | 99.8253 |
| rs7049105 | G | A | 0.2029 | 0.0165 | 8.63E-35 | 151.3848 |
| rs7099881 | G | A | 0.1151 | 0.0167 | 5.05E-12 | 47.6656 |
| rs7332465 | A | G | -0.1152 | 0.0195 | 3.54E-09 | 34.8625 |
| rs74026308 | T | G | -0.1823 | 0.0227 | 9.01E-16 | 64.6364 |
| rs77216358 | G | A | 0.1800 | 0.0293 | 7.83E-10 | 37.8010 |
| rs8082932 | C | T | -0.0953 | 0.0172 | 3.17E-08 | 30.6001 |
| rs9381973 | A | G | -0.1686 | 0.0289 | 5.41E-09 | 34.0353 |
| rs9494456 | G | A | -0.1094 | 0.0167 | 5.31E-11 | 43.0571 |
| rs9544025 | T | G | 0.1111 | 0.0165 | 1.67E-11 | 45.3247 |
| rs9913911 | G | A | -0.1721 | 0.0173 | 1.93E-23 | 99.5339 |

**Abbreviations:** POAG, primary open-angle glaucoma; SNP, single-nucleotide polymorphism; SE, standard error.

**Table S6. Mendelian randomization estimates from genetically predicted senile cataract and POAG**

**on kidney function**

| **Exposure** | **Outcome** | **Methods** | **No. of SNPs** | **Effect size (95%CI)** | **P** | **Cochran_P** | **Intercept_P** |
| --- | --- | --- | --- | --- | --- | --- | --- |
| Cataract | CKD | IVW | 34 | OR:1.03 (0.97, 1.10) | 0.238 | 0.27 | 0.501 |
| MR-Egger | 34 | OR:0.98 (0.83, 1.16) | 0.829 |
| WM | 34 | OR:1.02 (0.95, 1.11) | 0.508 |
| Cataract | eGFR | IVW | 34 | β: -0.0036 (-0.0074, 0.0002) | 0.059 | <0.001 | 0.168 |
| MR-Egger | 34 | β: 0.0034 (-0.0071, 0.0139) | 0.528 |
| WM | 34 | β: -0.0014 (-0.0049, 0.0021) | 0.443 |
| Cataract | UACR | IVW | 33 | β: 0.0078 (-0.0079, 0.0235) | 0.024 | 0.004 | 0.193 |
| MR-Egger | 33 | β: 0.0354 (-0.0082, 0.0790) | 0.079 |
| WM | 33 | β: -0.0015 (-0.0198, 0.0169) | 0.017 |
| POAG | CKD | IVW | 29 | OR:1.00 (0.97, 1.02) | 0.776 | 0.839 | 0.462 |
| MR-Egger | 29 | OR:1.03 (0.93, 1.14) | 0.531 |
| WM | 29 | OR:0.99 (0.95, 1.03) | 0.589 |
| POAG | eGFR | IVW | 30 | β: -0.0010 (-0.0027, 0.0008) | 0.274 | <0.001 | 0.868 |
| MR-Egger | 30 | β: -0.0005 (-0.0067, 0.0058) | 0.884 |
| WM | 30 | β: -0.0010 (-0.0028, 0.0009) | 0.331 |
| POAG | UACR | IVW | 28 | β: 0.0017 (-0.0080, 0.0113) | 0.736 | <0.001 | 0.263 |
| MR-Egger | 28 | β: -0.0171 (-0.0506, 0.0164) | 0.327 |
| WM | 28 | β: -0.0037 (-0.0139, 0.0065) | 0.327 |

**Abbreviations:** SNP, single nucleotide polymorphism; OR: odds ratio; CI: confidence intervals; WM: weighted median; IVW: inverse-variance weighted; CKD: chronic kidney disease; eGFR: estimated glomerular filtration rate; UACR: urinary albumin-to-creatinine ratio; POAG: primary open-angle glaucoma.

**Table S7. MR-PRESSO results of bidirectional Mendelian randomization analyses**

| **Exposure** | **Outcome** | **Outlier** | **MR analysis** | **Effect size (95%CI)** | **P** |
| --- | --- | --- | --- | --- | --- |
| CKD | Cataract | 0 | Raw | OR: 1.02 (0.98, 1.07) | 0.342 |
| Outlier-corrected | NA | NA |
| eGFR | Cataract | 1 (rs2634675) | Raw | OR: 1.08 (0.64, 1.81) | 0.777 |
| Outlier-corrected | OR: 1.02 (0.62,1.70) | 0.931 |
| UACR | Cataract | 1 (rs11709284) | **Raw** | **OR: 1.29 (1.05, 1.58)** | **0.020** |
| **Outlier-corrected** | **OR: 1.33 (1.10, 1.61)** | **0.004** |
| CKD | POAG | 1 (rs2484639) | Raw | OR: 0.95 (0.81, 1.12) | 0.557 |
| Outlier-corrected | OR: 0.99 (0.85, 1.15) | 0.875 |
| eGFR | POAG | 3 (rs10430743; rs1268176; rs6029632) | Raw | OR: 1.75 (0.57, 5.35) | 0.331 |
| Outlier-corrected | OR: 2.45 (0.87, 6.86) | 0.09 |
| UACR | POAG | 2 (rs162890; rs4641276) | Raw | OR: 1.06 (0.64, 1.75) | 0.825 |
| Outlier-corrected | OR: 1.03 (0.66, 1.63) | 0.885 |
| Cataract | CKD | 0 | Raw | OR: 1.04 (0.98, 1.10) | 0.246 |
| Outlier-corrected | NA | NA |
| Cataract | eGFR | 3 (rs2596522; rs28617339; rs4872531) | Raw | β: -0.0036 (-0.0074, 0.0002) | 0.0687 |
| Outlier-corrected | β: -0.0030 (-0.0062, 0.0002) | 0.0749 |
| Cataract | UACR | 0 | Raw | β: 0.0078 (-0.0079, 0.0235) | 0.338 |
| Outlier-corrected | NA | NA |
| POAG | CKD | 0 | Raw | OR: 1.00 (0.97, 1.02) | 0.743 |
| Outlier-corrected | NA | NA |
| POAG | eGFR | 1 (rs676015) | Raw | β: -0.0010 (-0.0027, 0.0008) | 0.283 |
| Outlier-corrected | β: -0.0006 (-0.0022, 0.001) | 0.471 |
| POAG | UACR | 2 (rs2627761; rs7099881) | Raw | β: 0.0017 (-0.0079, 0.0113) | 0.739 |
| Outlier-corrected | β: 0.0017 (-0.0067, 0.0102) | 0.692 |

**Note:** Bold values indicate statistical significance at P < 0.05 in the MR analysis.

**Abbreviations:** OR, odds ratio; CI, confidence interval; CKD, chronic kidney disease; POAG, primary open-angle glaucoma; eGFR, estimated glomerular filtration rate; UACR, urinary albumin-to-creatinine ratio; NA: not applicable.

**Table S8**. Genes mapped by FUMA

| KIF1B | PRRC2C | CCDC12 | PDCL2 | RHBDD2 | BDNF | GATM | ACTG1 |
| --- | --- | --- | --- | --- | --- | --- | --- |
| DFFA | EDEM3 | NBEAL2 | NMU | POR | FAM86C1 | SPATA5L1 | NPLOC4 |
| CASZ1 | FAM129A | SCAP | EXOC1 | STYXL1 | RP11-849H4.2 | C15orf48 | OXLD1 |
| S100PBP | CACNA1S | ABHD14B | G3BP2 | MDH2 | RNF121 | SLC30A4 | ARL16 |
| FKSG48 | TMEM9 | ALAS1 | NAAA | SRRM3 | IL18BP | BLOC1S6 | DCXR |
| AK2 | SLC5A6 | TWF2 | SCARB2 | HSPB1 | NUMA1 | SQRDL | GRAMD1A |
| ZNF362 | ATRAID | PPM1M | FAM47E | ZP3 | LRTOMT | STOML1 | HPN |
| A3GALT2 | CAD | WDR82 | FAM47E-STBD1 | UPK3B | LAMTOR1 | PML | FCGBP |
| PHC2 | EIF2B4 | GLYCTK | FAM47E-STBD1 | POMZP3 | ANAPC15 | SEMA7A | SERTAD1 |
| PDZK1IP1 | SNX17 | DNAH1 | CCDC158 | SLC25A37 | FOLR3 | UBL7 | SHKBP1 |
| TAL1 | ZNF513 | NISCH | SHROOM3 | STC1 | FOLR2 | CYP1A1 | ADCK4 |
| ADAM15 | PPM1G | STAB1 | NR3C2 | RAB2A | INPPL1 | CSK | C19orf54 |
| EFNA3 | NRBP1 | NT5DC2 | CWC27 | CHD7 | TRIM29 | ULK3 | RAB4B |
| EFNA1 | KRTCAP3 | SMIM4 | CENPK | HEY1 | OAF | SCAMP2 | EGLN2 |
| SLC50A1 | IFT172 | PBRM1 | CDC42SE2 | ZBTB10 | LYZ | MPI | CTC-490E21.12 |
| DPM3 | GCKR | GNL3 | ACSL6 | CUBN | YEATS4 | FAM219B | CYP2A6 |
| KRTCAP2 | AC109829.1 | GLT8D1 | P4HA2 | TRDMT1 | FRS2 | COX5A | CYP2A7 |
| RP11-201K10.3 | ZNF512 | SPCS1 | PDLIM4 | VIM | CCT2 | PPCDC | CYP2S1 |
| TRIM46 | GPN1 | NEK4 | SLC22A4 | NEBL | LRRC10 | C15orf39 | AXL |
| MUC1 | ACOXL | ITIH1 | SLC22A5 | SKIDA1 | KCNMB4 | COMMD4 | HNRNPUL1 |
| THBS3 | CPS1 | ITIH3 | C5orf56 | MLLT10 | ZFP36L1 | MAN2C1 | TGFB1 |
| MTX1 | IRS1 | ITIH4 | IRF1 | DNAJC1 | GCHFR | SNUPN | CCDC97 |
| GBA | RHBDD1 | RP5-966M1.6 | KIF3A | C10orf11 | RPAP1 | IMP3 | B3GNT8 |
| FAM189B | COL4A4 | TMEM110 | SHROOM1 | HHEX | TYRO3 | TLCD2 | CEACAM4 |
| YY1AP1 | CCR3 | SFMBT1 | SAYSD1 | CYP26C1 | MGA | WDR81 | CA11 |
| DAP3 | CCR1 | RFT1 | KCNK5 | CYP26A1 | MAPKBP1 | SERPINF2 | NTN5 |
| GON4L | CCR2 | TKT | AHR | MYOF | PLA2G4B | SERPINF1 | RASIP1 |
| SYT11 | ALS2CL | SRD5A3 | SCRN1 | CCDC34 | SPTBN5 | RPA1 | IZUMO1 |
| RIT1 | PRSS42 | TMEM165 | AUTS2 | LGR4 | EHD4 | RP11-1055B8.6 | FUT1 |
| SEMA4A | MYL3 | CLOCK | HIP1 | LIN7C | SLC28A2 | RP11-1055B8.7 | FGF21 |
| BCAT2 |  |  |  |  |  |  |  |


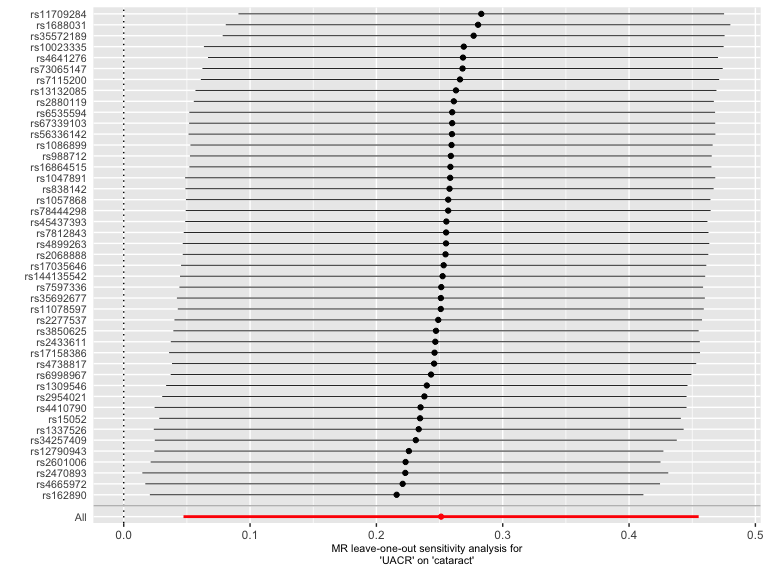


**Figure S1 The leave-one-out analysis for UACR on cataract**

**Abbreviations:** UACR: urinary albumin-to-creatinine ratio.
